# Supplementary material for: Localization of Flavan-3-ol Species in Peanut Testa by Mass Spectrometry Imaging
Source: PubMed Central journal article supplement (PMC7287834; doi:10.3390/molecules25102373), 2020-05-20
Supplement: molecules-25-02373-s001.pdf [file molecules-25-02373-s001.pdf]

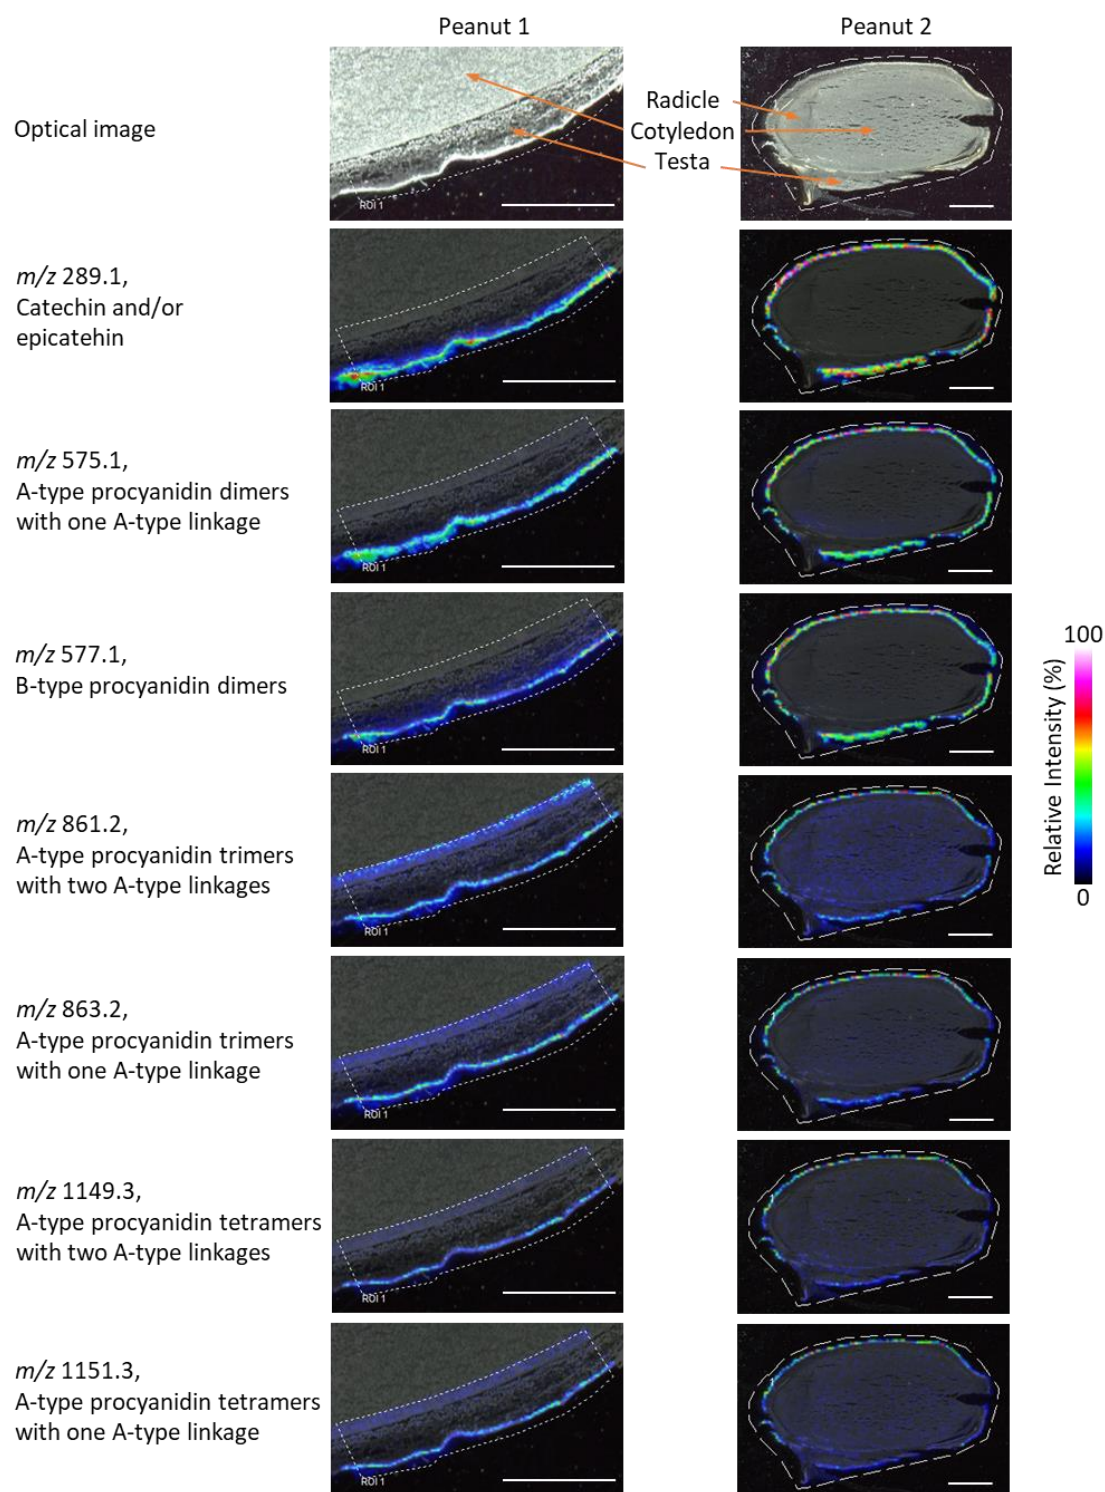

**Supplementary Figure S1.** Representative ion images of the assigned flavan-3-ol species in peanut sections by matrix-assisted laser desorption/ionization-mass spectrometry imaging. These ion images were obtained from two peanuts different from that shown in Figure 3. The dotted white line shows the analyzed region. Scale bar = 2 mm.
